# Supplementary material for: Enhanced Fine-Form Perception Does Not Contribute to Gestalt Face Perception in Autism Spectrum Disorder
Source: PLoS One. 2017 Feb 1;12(2):e0170239. doi: 10.1371/journal.pone.0170239 (PMC5287487; doi:10.1371/journal.pone.0170239)
Supplement: S1 Dataset — (XLSX) [file pone.0170239.s001.xlsx]

## Sheet: RG&BW_N1
Subjects	ch70_lat	ch70_amp	ch74_lat	ch74_amp	ch75_lat	ch75_amp	ch82_lat	ch82_amp	ch83_lat	ch83_amp	RG_ROI_lat	RG_ROI_amp	ch70_lat	ch70_amp	ch74_lat	ch74_amp	ch75_lat	ch75_amp	ch82_lat	ch82_amp	ch83_lat	ch83_amp	BW_ROI_lat	BW_ROI_amp
TD_01	108	4.71	110	5.85	112	5.24	108	4.9	110	5.3	109.6	5.2	102	3.3	100	4.69	98	3.61	98	3.83	98	3.96	99.2	3.878
TD_02	106	10.3	106	10.5	108	15.1	106	12.9	106	11	106.4	11.96	100	4.06	100	3.9	100	5.55	100	4.37	100	3.86	100	4.348
TD_03	78	-1.2	84	-0.1	82	-0.48	84	-0.2	80	-0.8	81.6	-0.556	94	1.07	98	2.62	96	3.33	100	3.67	98	2.65	97.2	2.668
TD_04	90	18.2	90	21.2	92	25	90	22	92	21.5	90.8	21.58	98	13.2	98	12.6	98	16.7	98	12.8	98	12.3	98	13.52
TD_05	104	13.5	106	19.1	106	23.3	106	26.2	106	18.9	105.6	20.2	102	5.6	102	7.8	100	12.5	100	12.8	98	11.6	100.4	10.06
TD_06	104	14.2	104	18.3	104	19	104	15.9	104	11.6	104	15.8	92	6.84	92	7.91	94	9.37	94	5.5	96	4.24	93.6	6.772
TD_07	112	-0.9	112	5.64	114	5.25	112	8.68	112	9.56	112.4	5.646	102	-0.6	108	1.99	104	1.55	108	3.07	106	3.07	105.6	1.816
TD_08	104	8.35	104	6.88	106	9.5	106	4.88	108	3.19	105.6	6.56	100	4.6	100	3.72	102	4.83	104	2.92	110	3.3	103.2	3.874
TD_09	102	5.94	104	11.7	104	9.9	104	11.2	106	8.15	104	9.378	94	1.42	94	3.67	94	4.09	94	3.32	94	3.28	94	3.156
TD_10	108	11.4	108	9.27	110	10.4	112	7.7	116	6.7	110.8	9.094	102	4.54	102	3.41	100	4.8	100	2.66	100	1.7	100.8	3.422
TD_11	102	12.4	102	11.2	100	5.94	100	6.56	102	11.8	101.2	9.58	98	6.55	98	4.22	96	7.16	96	4.65	96	5.88	96.8	5.692
TD_12	96	6.67	96	11.5	98	10.4	98	14.6	98	8.68	97.2	10.37	98	7.05	96	10.7	98	8.36	96	10.7	96	6.08	96.8	8.578
TD_13	102	2.98	102	6.71	100	3.89	100	7.04	100	2.87	100.8	4.698	96	1.34	98	4	96	2.7	96	4.35	96	1.91	96.4	2.86
TD_14	120	7.46	120	6.95	120	9.14	118	7.84	116	14.5	118.8	9.178	104	1.78	106	2.29	106	3.39	106	2.47	106	4.29	105.6	2.844
ASD_01	118	7.77	116	9.89	114	11	116	11.7	118	14	116.4	10.872	86	4.89	86	6.5	88	7.27	86	7.74	86	9.42	86.4	7.164
ASD_02	160	4.89	156	7.01	156	7.36	154	8.87	156	7.11	156.4	7.048	84	2.06	88	4.93	86	3.84	88	7.76	88	5.31	86.8	4.78
ASD_03	128	3.73	126	1.76	124	1.47	128	0.41	128	1.08	126.8	1.69	90	4.61	90	7.21	92	7.97	90	6.57	90	8.11	90.4	6.894
ASD_04	104	19.6	104	16.4	102	18.5	104	9.87	110	5.07	104.8	13.888	88	10.6	88	9	92	10.2	88	6.3	86	1.24	88.4	7.468
ASD_05	112	5.57	108	9.78	106	9.78	106	11.8	106	12.7	107.6	9.926	84	1.61	84	3.84	86	4.01	84	4.35	84	5.61	84.4	3.884
ASD_06	128	4.32	110	7.34	114	6.53	110	8	120	5.75	116.4	6.388	94	2.33	94	5.41	98	5.13	94	5.71	96	3.79	95.2	4.474
ASD_07	120	13.5	120	8.87	118	18.5	120	9.07	120	18.8	119.6	13.748	98	9.27	98	6.48	100	12.9	98	6.48	98	12	98.4	9.426
ASD_08	106	1.43	106	1.58	106	2.91	110	0.56	120	1.35	109.6	1.566	82	2.84	82	1.7	84	2.98	82	1.25	82	0.9	82.4	1.934
ASD_09	104	17.9	106	15.5	104	18.3	106	11.3	106	11	105.2	14.8	94	11.2	94	12.4	96	12.1	94	9.07	92	7.7	94	10.494
ASD_10	104	19.4	104	10.1	104	18.3	106	8.22	106	9	104.8	13.004	88	9.22	88	6.02	88	9.2	88	5.38	88	5.18	88	7
ASD_11	108	13	108	10.9	110	13.7	110	9.82	110	10.7	109.2	11.624	96	8.53	96	7.66	96	8.41	96	6.88	96	7.06	96	7.708
ASD_12	118	3.21	118	3.12	116	3.94	118	3.44	116	4.17	117.2	3.576	94	1.2	96	0.96	96	2.01	96	1.28	96	1.91	95.6	1.472
ASD_13	122	0.27	126	0.52	124	0.84	126	0.35	120	0.73	123.6	0.542	98	0.87	98	1.33	102	1.82	100	1.83	102	1.74	100	1.518
ASD_14	100	28.3	100	22.2	100	27.2	100	25.8	100	19.9	100	24.68	84	22.4	84	17.1	84	18.8	84	17.9	84	12.3	84	17.7

## Sheet: Face_P1
Subjects	ch75_lat	ch75_amp	ch82_lat	ch82_amp	ch83_lat	ch83_amp	ch89_lat	ch89_amp	ch90_lat	ch90_amp	Neutral_ROI_lat	Neutral_ROI_amp	ch75_lat	ch75_amp	ch82_lat	ch82_amp	ch83_lat	ch83_amp	ch89_lat	ch89_amp	ch90_lat	ch90_amp	Happy_ROI_lat	Happy_ROI_amp	ch75_lat	ch75_amp	ch82_lat	ch82_amp	ch83_lat	ch83_amp	ch89_lat	ch89_amp	ch90_lat	ch90_amp	Anger_ROI_lat	Anger_ROI_amp
TD_01	124	0.315	125	0.695	113	0.315	126	0.34	125	0.4	122.6	0.413	122	0.72	120	1.12	120	0.54	122	0.99	122	1.05	121.2	0.884	126	-0.09	130	0.27	106	0.09	130	-0.31	128	-0.25	124	-0.058
TD_02	108	1.6	108	2.45	108	2.27	108	2.88	106	2.39	107.6	2.318	112	1.48	110	2.05	112	1.97	108	2.31	110	2.27	110.4	2.016	116	1.45	116	1.97	114	1.28	114	1.99	114	1.94	114.8	1.726
TD_03	132	5.28	134	4.52	130	4.73	132	4.71	130	4.71	131.6	4.79	126	6.75	128	6.48	126	6.59	128	6.48	128	6.56	127.2	6.572	130	5.86	130	4.87	130	5.24	130	5.19	128	5.3	129.6	5.292
TD_04	134	4.3	130	1.04	130	2.16	94	2.16	94	2.85	116.4	2.502	134	4.03	130	1.04	132	1.78	98	1.46	100	2.62	118.8	2.186	134	4.03	130	1.04	132	1.78	96	3	102	2.29	118.8	2.428
TD_05	104	8.69	106	9.07	104	9.38	108	8.95	104	7.35	105.2	8.688	104	9.5	108	9.83	104	9.38	110	9.45	106	8.37	106.4	9.306	108	8.87	108	9.83	104	9.38	110	9.7	108	7.8	107.6	9.116
TD_06	102	1.09	102	1.82	102	2.38	104	2.29	104	1.71	102.8	1.858	104	1.57	106	2.27	108	2.67	106	2.55	110	2.21	106.8	2.254	102	2.74	104	3.51	104	3.89	106	3.76	106	3.25	104.4	3.43
TD_07	120	8.58	122	8.82	118	8.98	126	9.39	124	10.7	122	9.294	120	9.79	122	7.73	118	10.3	124	7.97	120	10.9	120.8	9.338	120	9.55	122	9.06	118	10.3	126	8.87	120	10.9	121.2	9.736
TD_08	108	2.33	108	1.53	104	2.33	106	0.89	100	1.58	105.2	1.732	108	2.52	108	2.77	104	3.1	106	2.97	104	2.44	106	2.76	108	2.82	108	2.36	104	3.5	106	2.64	104	2.82	106	2.828
TD_09	96	-1.32	100	-0.1	96	-0.06	104	1.87	98	3.49	98.8	0.776	96	-0.65	102	0.41	96	-0.06	106	1.54	98	3.04	99.6	0.856	96	0.65	108	-0.2	98	-0.75	112	1.75	104	2.35	103.6	0.76
TD_10	102	1.26	100	1.46	100	1.43	96	0.93	100	1.17	99.6	1.25	102	1.36	100	1.36	100	1.43	96	1.1	100	1.39	99.6	1.328	102	0.67	100	0.37	102	2.06	100	1.43	102	1.73	101.2	1.252
TD_11	120	3.61	114	4.03	114	5.78	114	3.34	114	4.03	115.2	4.158	120	3.68	116	3.18	116	5.66	114	3.07	112	4.26	115.6	3.97	114	3.68	116	3.22	112	5.5	114	3.8	114	4.46	114	4.132
TD_12	106	3.11	104	3.57	104	3.57	108	4.68	106	5.5	105.6	4.086	106	2.3	108	2.4	106	2.68	110	4.08	108	4.61	107.6	3.214	108	3.91	110	4.72	110	4.4	110	6.34	110	6.48	109.6	5.17
TD_13	100	1.13	104	2.03	106	1.67	104	2.85	112	1.67	105.2	1.87	102	1.87	102	2.73	106	2.43	104	3.59	110	2.33	104.8	2.59	96	2	100	2.57	98	1.85	100	2.73	120	1.73	102.8	2.176
TD_14	102	1.06	100	0.27	100	1.44	100	1.06	100	2.28	100.4	1.222	102	1.3	102	0.03	100	1.14	100	0.96	100	1.78	100.8	1.042	104	2.12	104	0.78	102	2.25	102	1.23	100	3.05	102.4	1.886
ASD_01	98	2.59	96	2.26	96	2.74	96	2.06	98	1.38	96.8	2.206	98	2.92	98	2.68	98	3.01	98	2.53	98	1.64	98	2.556	98	2.24	98	3.37	98	3.48	98	3.25	98	2.38	98	2.944
ASD_02	100	3.36	102	4.36	100	2.39	106	3.4	112	1.99	104	3.1	104	4.08	102	5.14	102	4.11	102	4.62	102	3.31	102.4	4.252	98	2.13	102	3.97	100	2.79	106	4.28	106	2.56	102.4	3.146
ASD_03	92	1.28	92	1.16	92	-0.4	92	0.42	90	1.56	91.6	0.804	92	3.24	94	2.07	92	2.35	94	1.64	90	2.94	92.4	2.448	64	5.57	98	3.7	96	5.35	98	5.37	96	6.64	90.4	5.326
ASD_04	90	3.1	90	1.91	92	2.43	80	3.45	82	3.77	86.8	2.932	92	6.1	92	6.39	92	5.77	88	3.87	88	4.05	90.4	5.236	88	5.27	90	4.05	90	5.2	86	4.15	84	3.59	87.6	4.452
ASD_05	92	3.66	94	4.24	92	4.3	94	3.14	94	2.86	93.2	3.64	94	3.16	96	3.68	94	4.18	98	3.24	94	2.86	95.2	3.424	96	3.48	98	3.92	96	4.5	98	3.75	98	3.51	97.2	3.832
ASD_06	104	4.13	102	2.7	106	5.38	102	3.35	108	5.49	104.4	4.21	108	3.62	104	2.92	106	5.16	106	2.84	106	4.9	106	3.888	98	4.27	100	3.83	102	4.61	102	3.76	110	5.52	102.4	4.398
ASD_07	134	4.04	132	4.74	132	4.85	130	5.12	130	5.76	131.6	4.902	136	3.59	132	4.93	136	4.4	132	4.49	132	4.85	133.6	4.452	130	3.9	126	4.35	130	4.28	126	4.28	130	5.33	128.4	4.428
ASD_08	84	3.08	84	1.68	84	2.22	88	2.76	86	4.32	85.2	2.812	88	3.97	90	2.89	90	3.67	90	4.32	92	6.22	90	4.214	88	2.7	92	1.53	92	2.47	94	3.58	96	5.37	92.4	3.13
ASD_09	94	-0.33	114	2.11	120	2.01	114	3.37	116	3.41	111.6	2.114	94	-0.31	114	1.64	122	1.69	116	2.77	122	3.29	113.6	1.816	88	-0.72	92	0.15	90	0.28	118	0.41	130	1.55	103.6	0.334
ASD_10	96	3.31	100	2.25	100	2.53	98	1.63	100	1.41	98.8	2.226	102	3.49	100	2.03	104	2.3	102	1.19	102	1.16	102	2.034	102	3.31	104	1.89	104	2.59	106	1.63	106	1.49	104.4	2.182
ASD_11	94	0.12	112	0.74	122	0.74	114	1.29	122	2.55	112.8	1.088	96	4.52	102	0.79	100	0.79	114	1.44	120	2.21	106.4	1.95	96	6.26	108	0.1	100	0.94	114	1.75	122	2.43	108	2.296
ASD_12	98	3.75	104	4.85	102	3.73	106	4.81	108	3.84	103.6	4.196	104	3.47	108	4.18	106	4.03	110	4.12	110	3.94	107.6	3.948	106	3.92	112	5.13	108	4.56	114	5.37	112	4.88	110.4	4.772
ASD_13	110	3.24	108	4.25	110	3.6	110	4.03	112	2.6	110	3.544	110	2.94	108	3.95	110	3.6	114	3.47	120	2.79	112.4	3.35	110	2.94	112	4.17	110	3.6	114	3.92	118	2.96	112.8	3.518
ASD_14	90	3.6	92	4.42	94	4.85	98	4.56	100	6.96	94.8	4.878	92	3.81	96	5.54	92	3.63	98	4.59	96	5.23	94.8	4.56	92	4	94	4.8	96	5.8	100	4.56	100	8.3	96.4	5.492

## Sheet: Face_N170
Subjects	ch89_lat	ch89_amp	ch90_lat	ch90_amp	ch95_lat	ch95_amp	ch96_lat	ch96_amp	ch100_lat	ch100_amp	Neutral_ROI_lat	Neutral_ROI_amp	ch89_lat	ch89_amp	ch90_lat	ch90_amp	ch95_lat	ch95_amp	ch96_lat	ch96_amp	ch100_lat	ch100_amp	Happy_ROI_lat	Happy_ROI_amp	ch89_lat	ch89_amp	ch90_lat	ch90_amp	ch95_lat	ch95_amp	ch96_lat	ch96_amp	ch100_lat	ch100_amp	Anger_ROI_lat	Anger_ROI_amp
TD_01	140	-0.015	141	-0.095	143	-0.11	142	0.04	148	0.55	142.8	0.074	138	-0.62	140	-0.68	142	-0.67	142	-0.41	150	0.4	142.4	-0.396	142	0.59	142	0.49	144	0.45	142	0.49	146	0.7	143.2	0.544
TD_02	138	-0.74	128	-0.83	140	-0.49	128	-0.58	144	-0.06	135.6	-0.54	140	-0.04	134	-0.66	142	0.45	134	-0.37	146	0.82	139.2	0.04	140	0.25	132	-1.3	142	-0.04	134	-1.25	146	-0.02	138.8	-0.472
TD_03	172	0.56	170	0.1	170	0.11	170	0.58	168	1.09	170	0.488	172	0.26	172	-0.2	172	0.16	172	0.35	170	1.31	171.6	0.376	176	0.21	176	-0.38	174	0.93	174	-0.15	176	0.69	175.2	0.26
TD_04	136	1.95	140	2.78	132	5.82	138	6.75	130	8.43	135.2	5.146	136	2.41	140	2.28	134	6.01	138	6.29	130	8.57	135.6	5.112	138	2.14	140	2.84	134	0.67	138	7.36	134	9.31	136.8	4.464
TD_05	148	5.43	144	8.41	150	6.58	148	7	152	4.8	148.4	6.444	150	5.75	146	8.86	150	7.01	150	7.51	152	4.8	149.6	6.786	152	6.31	148	9.16	152	6.83	150	7.78	156	5.11	151.6	7.038
TD_06	134	3.28	130	2.3	134	3.65	134	2.39	138	3.07	134	2.938	138	3.45	138	1.96	138	3.3	140	2.17	142	2.67	139.2	2.71	140	1.36	140	0.53	138	1.13	140	0.66	142	1.62	140	1.06
TD_07	166	-2.44	164	-4	164	-2.8	166	-2.2	166	-2.1	165.2	-2.708	166	-1.38	164	-3.65	166	-1.87	166	-2.5	166	-1.38	165.6	-2.156	168	-1.67	164	-3.65	170	-1.67	170	-2.8	170	-0.82	168.4	-2.122
TD_08	138	2.97	136	3.08	138	3.33	136	2.81	136	3.19	136.8	3.076	142	2.81	138	3.4	142	3.5	140	3.06	142	2.32	140.8	3.018	148	3.61	140	3.22	142	3.5	140	2.95	142	3.48	142.4	3.352
TD_09	138	1.73	138	0.83	142	1.4	142	0.92	144	1.65	140.8	1.306	140	2.46	140	1.65	144	2.64	144	1.65	146	1.79	142.8	2.038	140	2.34	140	1.22	144	2.34	146	1.28	148	2.52	143.6	1.94
TD_10	134	2.4	146	2.1	128	3.89	146	1.81	126	3.4	136	2.72	134	2.14	146	1.81	134	3.1	142	2.1	144	2.14	140	2.258	134	2.77	146	1.81	132	4.39	136	1.54	130	3.14	135.6	2.73
TD_11	154	2	154	1.89	150	1.54	150	1.34	148	0.92	151.2	1.538	154	2.23	154	2.35	150	2.46	152	1.93	150	1.42	152	2.078	154	1.7	154	2	150	1.77	150	1.34	148	0.92	151.2	1.546
TD_12	138	0.66	138	0.45	134	1.43	134	1.12	132	1.08	135.2	0.948	140	1.4	138	1.75	136	1.82	134	1.5	136	1.29	136.8	1.552	140	0.23	138	-0.3	136	0.45	134	0.3	136	0.76	136.8	0.288
TD_13	142	0.98	150	1.42	144	2.78	150	1.78	144	2.44	146	1.88	138	1.06	154	1.6	144	2.36	150	1.78	144	1.74	146	1.708	140	1.46	150	1.22	144	2.18	150	1.64	144	1.46	145.6	1.592
TD_14	142	5.02	142	6.44	142	6.61	142	7.23	142	4.68	142	5.996	144	5.09	144	7.11	144	5.31	146	8.04	144	5.31	144.4	6.172	146	4.89	146	6.42	146	5.78	148	7.33	146	4.44	146.4	5.772
ASD_01	146	1.07	144	-0.04	150	1.39	150	0.26	152	0.68	148.4	0.672	134	0.02	130	-0.21	138	0.68	134	0.05	148	1.13	136.8	0.334	146	0.91	144	0.26	148	1.6	144	0.35	150	1.54	146.4	0.932
ASD_02	168	3.03	170	1.8	170	2.49	170	1.83	166	3.21	168.8	2.472	164	3.92	170	2.72	168	3.23	170	2.35	164	3.7	167.2	3.184	162	4.38	164	3.04	166	3.75	168	2.92	168	4.04	165.6	3.626
ASD_03	134	4.28	132	4.65	136	3.69	134	3.82	136	4.34	134.4	4.156	158	1.91	140	3	156	1.52	154	1.99	156	2.58	152.8	2.2	126	-3.7	126	-4.4	130	-3.1	126	-5.2	126	-3	126.8	-3.88
ASD_04	146	1.43	144	1.86	140	6.1	142	3.01	132	5.54	140.8	3.588	146	4.76	146	5.4	146	6.27	148	3.47	140	4	145.2	4.78	146	2.73	146	4.48	146	3.79	146	2.2	174	2.55	151.6	3.15
ASD_05	140	2	142	1.27	142	2.05	140	1.6	140	1.53	140.8	1.69	144	2.39	142	1.77	144	2.31	144	1.77	144	1.25	143.6	1.898	144	1.98	144	1.4	146	2.07	148	1.64	144	1.23	145.2	1.664
ASD_06	148	0.43	146	-0.3	146	2.05	146	1.35	146	3.2	146.4	1.346	152	0.4	150	-0.22	152	1.61	154	0.69	146	2.38	150.8	0.972	162	1.72	164	-0.56	168	3.04	164	1.83	166	4.15	164.8	2.036
ASD_07	184	0.9	192	-0.17	184	-0.16	182	0.52	180	1.88	184.4	0.594	194	1.52	192	0.06	184	1.78	174	1.33	180	2.67	184.8	1.472	182	1.76	182	0.69	180	2.81	180	1.95	180	3.39	180.8	2.12
ASD_08	144	2.37	134	2.26	148	1.98	144	1.45	150	1.56	144	1.924	152	2.24	152	2.97	150	1.71	148	1.71	150	1.26	150.4	1.978	148	4.2	150	4	152	2.54	152	2.85	150	1.88	150.4	3.094
ASD_09	180	-0.68	180	-0.32	180	-1.08	182	-0.63	150	-0.84	174.4	-0.71	158	-0.32	180	-0.32	174	-0.23	180	-0.57	150	-0.1	168.4	-0.308	174	1.35	180	1.04	176	1.33	180	1.28	150	1.56	172	1.312
ASD_10	150	1.35	148	0.99	150	1.38	148	1.28	150	1.04	149.2	1.208	146	1.48	148	1.15	148	1.43	148	1.28	148	1.04	147.6	1.276	146	1.48	148	1	146	1.38	148	1.28	148	1.11	147.2	1.25
ASD_11	176	0.34	182	0.57	152	0.88	178	0.76	156	0.87	168.8	0.684	154	1.15	178	0.24	154	1.51	172	1	150	1.27	161.6	1.034	174	1.23	186	1.03	178	1.39	186	1.27	190	1.08	182.8	1.2
ASD_12	156	2.74	154	3.76	154	3.85	154	3.69	158	4.9	155.2	3.788	156	3.26	154	3.63	154	3.95	154	3.5	158	4.83	155.2	3.834	160	2.52	156	3.15	158	3.55	158	3.13	162	4.02	158.8	3.274
ASD_13	154	0.72	156	0.94	156	1.19	160	1.12	160	0.97	157.2	0.988	158	1.27	158	1.19	158	1.38	162	1.23	160	1.02	159.2	1.218	156	0.72	156	0.79	156	0.77	158	0.82	158	0.92	156.8	0.804
ASD_14	146	1.42	152	1.11	142	3.27	144	4.41	142	4.71	145.2	2.984	146	1.21	150	2.96	144	4.54	146	6.29	142	6.69	145.6	4.338	142	2.56	158	1.45	144	3.67	152	4.94	146	5	148.4	3.524

## Sheet: Conduction_time
Subjects	Neutral_ROI_N170lat	Neutral_ROI_P1lat	BW_ROI_N1lat	Neutral_N170 minus P1lat	Neutal_N170 minus BW_N1lat	Happy_ROI_N170lat	Happy_ROI_P1lat	BW_ROI_N1lat	Happy_N170 minus P1lat	Happy_N170 minus BW_N1lat	Anger_ROI_N170lat	Anger_ROI_P100lat	BW_ROI_N1lat	Anger_N170 minus P1lat	Anger_N170 minus BW_N1lat	Neutral_ROI_N170amp	Neutral_ROI_P1amp	BW_ROI_N1amp	Neutral_N170/P1amp	Neutral_N170/BW_N1amp	Happy_ROI_N170amp	Happy_ROI_P1amp	BW_ROI_N1amp	Happy_N170/P1amp	Happy_N170/BW_N1amp	Anger_ROI_N170amp	Anger_ROI_P1amp	BW_ROI_N1amp	Anger_N170/P1amp	Anger_N170/BW_N1amp
TD_01	142.8	122.6	99.2	20.2	43.6	142.4	121.2	99.2	21.2	43.2	143.2	124	99.2	19.2	44	0.074	0.413	3.878	0.179177	0.019082	-0.396	0.884	3.878	-0.447964	-0.102114	0.544	-0.058	3.878	-9.37931	0.140278
TD_02	135.6	107.6	100	28	35.6	139.2	110.4	100	28.8	39.2	138.8	114.8	100	24	38.8	-0.54	2.318	4.348	-0.232959	-0.124195	0.04	2.016	4.348	0.0198413	0.00919963	-0.472	1.726	4.348	-0.273465	-0.108556
TD_03	170	131.6	97.2	38.4	72.8	171.6	127.2	97.2	44.4	74.4	175.2	129.6	97.2	45.6	78	0.488	4.79	2.668	0.101879	0.182909	0.376	6.572	2.668	0.0572124	0.14093	0.26	5.292	2.668	0.0491308	0.0974513
TD_04	135.2	116.4	98	18.8	37.2	135.6	118.8	98	16.8	37.6	136.8	118.8	98	18	38.8	5.146	2.502	13.52	2.05675	0.380621	5.112	2.186	13.52	2.33852	0.378107	4.464	2.428	13.52	1.83855	0.330178
TD_05	148.4	105.2	100.4	43.2	48	149.6	106.4	100.4	43.2	49.2	151.6	107.6	100.4	44	51.2	6.444	8.688	10.06	0.741713	0.640557	6.786	9.306	10.06	0.729207	0.674553	7.038	9.116	10.06	0.772049	0.699602
TD_06	134	102.8	93.6	31.2	40.4	139.2	106.8	93.6	32.4	45.6	140	104.4	93.6	35.6	46.4	2.938	1.858	6.772	1.58127	0.433845	2.71	2.254	6.772	1.20231	0.400177	1.06	3.43	6.772	0.309038	0.156527
TD_07	165.2	122	105.6	43.2	59.6	165.6	120.8	105.6	44.8	60	168.4	121.2	105.6	47.2	62.8	-2.708	9.294	1.816	-0.291371	-1.49119	-2.156	9.338	1.816	-0.230885	-1.18722	-2.122	9.736	1.816	-0.217954	-1.1685
TD_08	136.8	105.2	103.2	31.6	33.6	140.8	106	103.2	34.8	37.6	142.4	106	103.2	36.4	39.2	3.076	1.732	3.874	1.77598	0.794011	3.018	2.76	3.874	1.09348	0.77904	3.352	2.828	3.874	1.18529	0.865256
TD_09	140.8	98.8	94	42	46.8	142.8	99.6	94	43.2	48.8	143.6	103.6	94	40	49.6	1.306	0.776	3.156	1.68299	0.413815	2.038	0.856	3.156	2.38084	0.645754	1.94	0.76	3.156	2.55263	0.614702
TD_10	136	99.6	100.8	36.4	35.2	140	99.6	100.8	40.4	39.2	135.6	101.2	100.8	34.4	34.8	2.72	1.25	3.422	2.176	0.794857	2.258	1.328	3.422	1.7003	0.659848	2.73	1.252	3.422	2.18051	0.797779
TD_11	151.2	115.2	96.8	36	54.4	152	115.6	96.8	36.4	55.2	151.2	114	96.8	37.2	54.4	1.538	4.158	5.692	0.369889	0.270204	2.078	3.97	5.692	0.523426	0.365074	1.546	4.132	5.692	0.374153	0.271609
TD_12	135.2	105.6	96.8	29.6	38.4	136.8	107.6	96.8	29.2	40	136.8	109.6	96.8	27.2	40	0.948	4.086	8.578	0.232012	0.110515	1.552	3.214	8.578	0.482887	0.180928	0.288	5.17	8.578	0.055706	0.0335743
TD_13	146	105.2	96.4	40.8	49.6	146	104.8	96.4	41.2	49.6	145.6	102.8	96.4	42.8	49.2	1.88	1.87	2.86	1.00535	0.657343	1.708	2.59	2.86	0.659459	0.597203	1.592	2.176	2.86	0.731618	0.556643
TD_14	142	100.4	105.6	41.6	36.4	144.4	100.8	105.6	43.6	38.8	146.4	102.4	105.6	44	40.8	5.996	1.222	2.844	4.90671	2.1083	6.172	1.042	2.844	5.92322	2.17018	5.772	1.886	2.844	3.06045	2.02954
ASD_01	148.4	96.8	86.4	51.6	62	136.8	98	86.4	38.8	50.4	146.4	98	86.4	48.4	60	0.672	2.206	7.164	0.304624	0.0938023	0.334	2.556	7.164	0.130673	0.046622	0.932	2.944	7.164	0.316576	0.130095
ASD_02	168.8	104	86.8	64.8	82	167.2	102.4	86.8	64.8	80.4	165.6	102.4	86.8	63.2	78.8	2.472	3.1	4.78	0.797419	0.517155	3.184	4.252	4.78	0.748824	0.666109	3.626	3.146	4.78	1.15257	0.758577
ASD_03	134.4	91.6	90.4	42.8	44	152.8	92.4	90.4	60.4	62.4	126.8	90.4	90.4	36.4	36.4	4.156	0.804	6.894	5.16915	0.602843	2.2	2.448	6.894	0.898693	0.319118	-3.88	5.326	6.894	-0.728502	-0.562808
ASD_04	140.8	86.8	88.4	54	52.4	145.2	90.4	88.4	54.8	56.8	151.6	87.6	88.4	64	63.2	3.588	2.932	7.468	1.22374	0.48045	4.78	5.236	7.468	0.912911	0.640064	3.15	4.452	7.468	0.707547	0.4218
ASD_05	140.8	93.2	84.4	47.6	56.4	143.6	95.2	84.4	48.4	59.2	145.2	97.2	84.4	48	60.8	1.69	3.64	3.884	0.464286	0.435118	1.898	3.424	3.884	0.554322	0.488671	1.664	3.832	3.884	0.434238	0.428424
ASD_06	146.4	104.4	95.2	42	51.2	150.8	106	95.2	44.8	55.6	164.8	102.4	95.2	62.4	69.6	1.346	4.21	4.474	0.319715	0.300849	0.972	3.888	4.474	0.25	0.217255	2.036	4.398	4.474	0.462938	0.455074
ASD_07	184.4	131.6	98.4	52.8	86	184.8	133.6	98.4	51.2	86.4	180.8	128.4	98.4	52.4	82.4	0.594	4.902	9.426	0.121175	0.0630172	1.472	4.452	9.426	0.330638	0.156164	2.12	4.428	9.426	0.478771	0.22491
ASD_08	144	85.2	82.4	58.8	61.6	150.4	90	82.4	60.4	68	150.4	92.4	82.4	58	68	1.924	2.812	1.934	0.684211	0.994829	1.978	4.214	1.934	0.469388	1.02275	3.094	3.13	1.934	0.988498	1.59979
ASD_09	174.4	111.6	94	62.8	80.4	168.4	113.6	94	54.8	74.4	172	103.6	94	68.4	78	-0.71	2.114	10.494	-0.335856	-0.0676577	-0.308	1.816	10.494	-0.169604	-0.0293501	1.312	0.334	10.494	3.92814	0.125024
ASD_10	149.2	98.8	88	50.4	61.2	147.6	102	88	45.6	59.6	147.2	104.4	88	42.8	59.2	1.208	2.226	7	0.542677	0.172571	1.276	2.034	7	0.627335	0.182286	1.25	2.182	7	0.572869	0.178571
ASD_11	168.8	112.8	96	56	72.8	161.6	106.4	96	55.2	65.6	182.8	108	96	74.8	86.8	0.684	1.088	7.708	0.628676	0.088739	1.034	1.95	7.708	0.530256	0.134146	1.2	2.296	7.708	0.522648	0.155682
ASD_12	155.2	103.6	95.6	51.6	59.6	155.2	107.6	95.6	47.6	59.6	158.8	110.4	95.6	48.4	63.2	3.788	4.196	1.472	0.902765	2.57337	3.834	3.948	1.472	0.971125	2.60462	3.274	4.772	1.472	0.686085	2.22418
ASD_13	157.2	110	100	47.2	57.2	159.2	112.4	100	46.8	59.2	156.8	112.8	100	44	56.8	0.988	3.544	1.518	0.278781	0.650856	1.218	3.35	1.518	0.363582	0.802372	0.804	3.518	1.518	0.228539	0.529644
ASD_14	145.2	94.8	84	50.4	61.2	145.6	94.8	84	50.8	61.6	148.4	96.4	84	52	64.4	2.984	4.878	17.7	0.611726	0.168588	4.338	4.56	17.7	0.951316	0.245085	3.524	5.492	17.7	0.641661	0.199096
